# Supplementary material for: Nanobody-loaded nanobubbles targeting the G250 antigen with ultrasound/photoacoustic/fluorescence multimodal imaging capabilities for specifically enhanced imaging of RCC
Source: Royal Society of Chemistry journal article supplement (doi:10.1039/d3nr04097f), 2023-11-20
Supplement: d3nr04097f1.pdf [file d3nr04097f1.pdf]

**Nanobody-loaded nanobubbles targeting G250  
antigen with ultrasound/photoacoustic/fluorescence  
multimodal imaging capabilities for specifically enhanced  
imaging of RCC**

Jiajiu Chen<sup>a‡</sup>, Jingyi Li<sup>a‡</sup>, Chengjie Zhong<sup>b‡</sup>, Yi Ling<sup>c</sup>, Deng Liu<sup>c</sup>, Xin Li<sup>c</sup>, Jing Xu<sup>a</sup>,  
Qiuli Liu<sup>a</sup>, Yanli Guo<sup>c#</sup> and Luofu Wang<sup>a#</sup>

<sup>a</sup> Department of Urology, Daping Hospital, Army Medical University, Chongqing 400042, P.R.China

<sup>b</sup> The Second Clinical Medical College, Chongqing Medical University, Chongqing 400016, P.R.China

<sup>c</sup> Department of Ultrasound, Southwest Hospital, Army Medical University, Chongqing 400038, P.R.China

‡ These authors contributed equally to this work.

# Corresponding authors

Correspondence:

**Yanli Guo**

Department of Ultrasound, Southwest Hospital, Army Medical University, Chongqing 400038, P.R.China

Tel: +86-13608351873

Email: [guoyanli71@aliyun.com](mailto:guoyanli71@aliyun.com)

**Luofu Wang**

Department of Urology, Daping Hospital, Army Medical University, Chongqing 400042, P.R.China

Tel: +86-13320350708

Email: [wangluofu@aliyun.com](mailto:wangluofu@aliyun.com)

## Supplementary Information

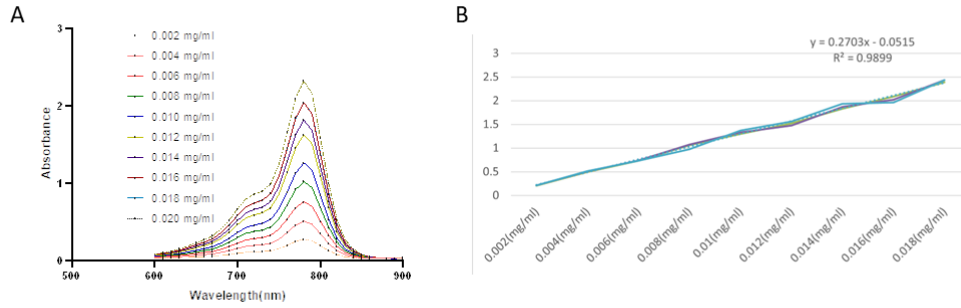

**Figure S1.** (A) Absorption spectra of AGN/ICG-NBs at different concentrations. (B) The fitting curve of AGN/ICG-NB concentration and absorption value at the optimum wavelength.

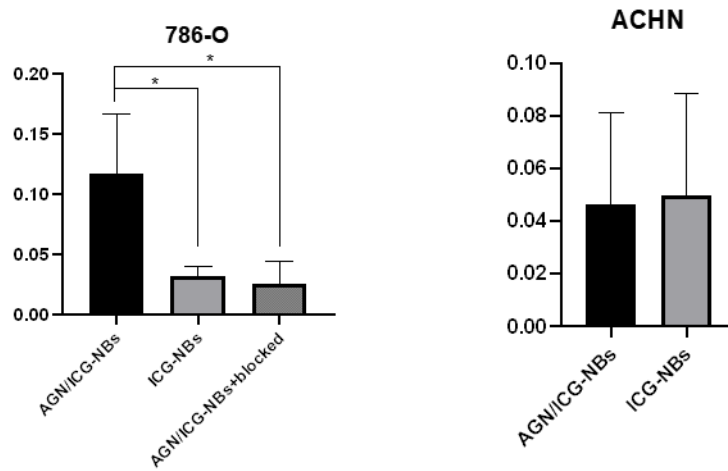

**Figure S2.** Quantification of the fluorescence signal intensity of AGN/ICG-NBs or ICG-NBs surrounding 2 types of tumor cells (\* indicates  $P < 0.05$ )

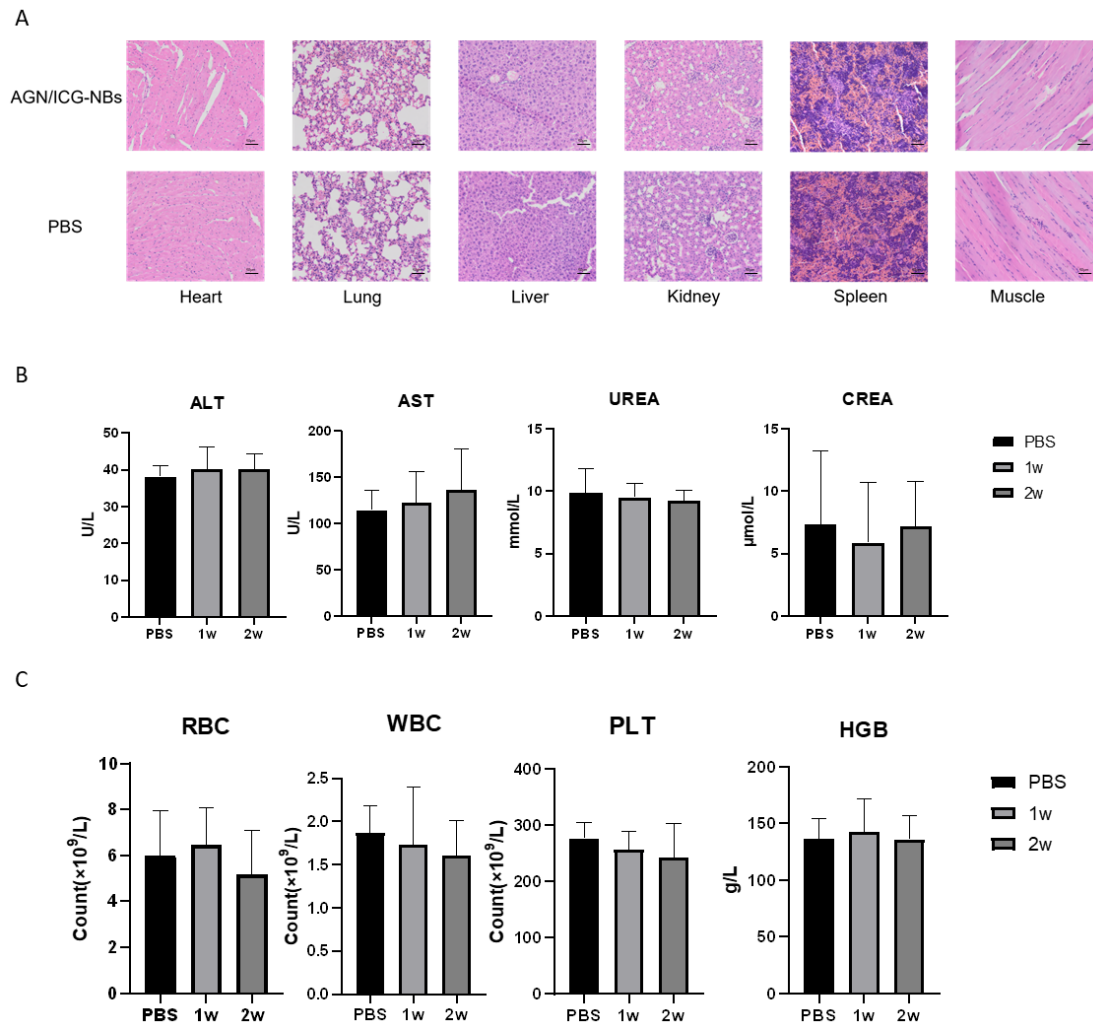

**Figure S3.** Detection of biosecurity of AGN/ICG-NBs. (A) H&E staining results of major organs of mice after injection of AGN/ICG-NBs and PBS for 2 weeks ( $n=3$ ). No significant injury was found. (B) The standard biochemical index of the mice after injection of PBS and AGN/ICG-NBs for 1 week and 2 weeks. ALT and AST levels reflect liver function.; UREA and CREA levels reflect renal function. No significant difference was found between the 3 groups ( $n=3$ ). (C) Major index results of blood routine of the mice after injection of PBS and AGN/ICG-NBs for 1 week and 2 weeks. No significant difference was found between the 3 groups ( $n=3$ ).
